# Supplementary material
Source: PubMed Central journal article supplement (PMC7604518)
Supplement: kwaa088_martinez-miller_web_material_final_kwaa088.pdf [file kwaa088_martinez-miller_web_material_final_kwaa088.pdf]

**Longitudinal Associations of US Acculturation With Cognitive Performance,  
Cognitive Impairment, and Dementia: The Sacramento Area Latino Study on Aging**

Erlene E. Martinez-Miller, Whitney R. Robinson, Christy L. Avery, Yang C. Yang, Mary  
N. Haan, Aric A. Prather, and Allison E. Aiello

**Table of Contents**

|                   |    |
|-------------------|----|
| Web Table 1.....  | 2  |
| Web Table 2.....  | 4  |
| Web Table 3.....  | 5  |
| Web Table 4.....  | 6  |
| Web Table 5.....  | 7  |
| Web Table 6.....  | 8  |
| Web Table 7.....  | 9  |
| Web Table 8.....  | 10 |
| Web Table 9.....  | 11 |
| Web Table 10..... | 12 |

**Web Table 1.** Unweighted (*n* = 1,430) and IPCW-weighted (*n* = 1,418) Sociodemographic and Health Characteristics<sup>a</sup> of Participants, Overall and by Censoring Status: Sacramento Area Latino Study on Aging, Sacramento, California, 1998–2008

|                                                 | <i>Median (Interquartile Range) or No. (%)</i><br>Unweighted |                        |                    |                    | <i>Median (Interquartile Range) or %</i><br>IPCW-weighted |                   |                   |                   |
|-------------------------------------------------|--------------------------------------------------------------|------------------------|--------------------|--------------------|-----------------------------------------------------------|-------------------|-------------------|-------------------|
|                                                 | Overall                                                      | Final Status           |                    |                    | Overall                                                   | Final Status      |                   |                   |
|                                                 |                                                              | Not LTFU<br>589 (41.2) | LTFU<br>554 (38.7) | Died<br>287 (20.1) |                                                           | Not LTFU<br>40.6  | LTFU<br>40.2      | Died<br>19.1      |
| <b>Sociodemographic factors</b>                 |                                                              |                        |                    |                    |                                                           |                   |                   |                   |
| Age                                             | 69.2 (64.8, 74.4)                                            | 68.8 (64.6, 73.3)      | 68.1 (64.1, 72.8)  | 73.2 (68.1, 78.7)  | 68.1 (64.1, 73.1)                                         | 67.0 (63.8, 71.6) | 67.0 (63.6, 71.7) | 72.8 (67.5, 78.0) |
| Female (vs. male)                               | 831 (58.1)                                                   | 350 (59.4)             | 339 (61.2)         | 142 (49.5)         | 60.1                                                      | 62.9              | 62.1              | 49.7              |
| US nativity (vs. non-US <sup>b</sup> )          | 724 (50.6)                                                   | 316 (53.7)             | 253 (45.7)         | 155 (54.0)         | 49.7                                                      | 51.7              | 45.4              | 54.6              |
| Migration age <sup>c</sup>                      | 29.0 (20.0, 43.6)                                            | 26.7 (19.0, 36.5)      | 32.3 (20.0, 48.0)  | 30.5 (21.7, 44.7)  | 30.0 (20.0, 47.1)                                         | 29.0 (19.0, 40.8) | 33.0 (20.4, 48.6) | 29.9 (21.5, 44.7) |
| Marriage/domestic partnership (vs. none)        | 858 (60.0)                                                   | 381 (64.7)             | 326 (58.8)         | 135 (47.2)         | 60.8                                                      | 34.4              | 59.2              | 53.8              |
| <i>Missing</i>                                  | 1                                                            | 0                      | 0                  | 1                  |                                                           |                   |                   |                   |
| High education (vs. low) <sup>d</sup>           | 461 (32.2)                                                   | 237 (40.2)             | 155 (28.0)         | 69 (24.0)          | 28.0                                                      | 32.8              | 25.5              | 22.9              |
| Number of years                                 | 7.0 (3.0, 12.0)                                              | 4.0 (9.0, 12.0)        | 6.0 (2.0, 12.0)    | 6.0 (2.0, 11.0)    | 6.0 (3.0, 12.0)                                           | 8.0 (3.0, 12.0)   | 6.0 (2.0, 12.0)   | 6.0 (2.0, 11.0)   |
| <b>Major lifetime occupation</b>                |                                                              |                        |                    |                    |                                                           |                   |                   |                   |
| Non-manual                                      | 322 (22.8)                                                   | 162 (27.9)             | 113 (20.6)         | 47 (16.6)          | 20.9                                                      | 24.7              | 19.3              | 16.4              |
| Manual                                          | 846 (59.8)                                                   | 319 (54.9)             | 340 (61.9)         | 187 (65.9)         | 60.5                                                      | 55.5              | 62.5              | 66.6              |
| Other <sup>e</sup>                              | 246 (17.4)                                                   | 100 (17.2)             | 96 (17.5)          | 50 (17.6)          | 18.7                                                      | 19.9              | 18.2              | 17.1              |
| <i>Missing</i>                                  | 16                                                           | 8                      | 5                  | 3                  |                                                           |                   |                   |                   |
| <b>Gross household income/ month</b>            |                                                              |                        |                    |                    |                                                           |                   |                   |                   |
| <\$1000                                         | 587 (41.6)                                                   | 192 (33.1)             | 254 (46.6)         | 139 (48.8)         | 24.7                                                      | 37.6              | 48.2              | 48.9              |
| \$1000-\$1999                                   | 458 (32.5)                                                   | 195 (33.6)             | 165 (30.3)         | 98 (34.4)          | 31.3                                                      | 31.8              | 29.3              | 34.6              |
| ≥\$2000                                         | 366 (25.9)                                                   | 194 (33.4)             | 126 (23.1)         | 48 (16.8)          | 44.0                                                      | 30.7              | 22.5              | 16.4              |
| <i>Missing</i>                                  | 19                                                           | 8                      | 9                  | 2                  |                                                           |                   |                   |                   |
| English survey language (vs. Spanish)           | 642 (44.9)                                                   | 300 (50.9)             | 220 (39.7)         | 122 (42.5)         | 45                                                        | 50.3              | 40.6              | 43.3              |
| <b>Measures of health</b>                       |                                                              |                        |                    |                    |                                                           |                   |                   |                   |
| Insurance (vs. none)                            | 1308 (91.6)                                                  | 552 (93.9)             | 482 (87.2)         | 274 (95.5)         | 89.5                                                      | 91.3              | 84.9              | 95.0              |
| <i>Missing</i>                                  | 2                                                            | 1                      | 1                  | 0                  |                                                           |                   |                   |                   |
| Self-rated health ≥good (vs. <good)             | 765 (54.0)                                                   | 352 (60.2)             | 291 (52.8)         | 122 (43.3)         | 52.8                                                      | 57.4              | 52.9              | 42.9              |
| <i>Missing</i>                                  | 12                                                           | 4                      | 3                  | 5                  |                                                           |                   |                   |                   |
| <b>Body mass index</b>                          |                                                              |                        |                    |                    |                                                           |                   |                   |                   |
| >25                                             | 243 (17.8)                                                   | 107 (18.5)             | 82 (15.9)          | 54 (19.8)          | 17.2                                                      | 18.1              | 15.3              | 19.3              |
| 25-29                                           | 527 (38.5)                                                   | 221 (38.2)             | 198 (38.4)         | 108 (39.6)         | 38.5                                                      | 38.3              | 38.2              | 39.7              |
| ≥30                                             | 598 (43.7)                                                   | 251 (43.4)             | 236 (45.7)         | 111 (40.7)         | 44.3                                                      | 43.6              | 46.5              | 41.0              |
| <i>Missing</i>                                  | 62                                                           | 10                     | 38                 | 14                 |                                                           |                   |                   |                   |
| Any alcohol consumption (vs. none) <sup>f</sup> | 817 (57.1)                                                   | 364 (61.8)             | 321 (57.9)         | 132 (46.0)         | 56.1                                                      | 58.9              | 57.8              | 46.4              |

|                                                 |                   |                   |                   |                   |                   |                   |                   |                   |  |
|-------------------------------------------------|-------------------|-------------------|-------------------|-------------------|-------------------|-------------------|-------------------|-------------------|--|
| Smoking status                                  |                   |                   |                   |                   |                   |                   |                   |                   |  |
| Never                                           | 653 (45.7)        | 285 (48.4)        | 259 (46.8)        | 109 (38.0)        | 46.2              | 49.7              | 47.1              | 36.9              |  |
| Former                                          | 617 (43.2)        | 246 (41.8)        | 233 (42.1)        | 138 (48.1)        | 41.9              | 39.3              | 41.4              | 48.7              |  |
| Current                                         | 160 (11.2)        | 58 (9.9)          | 62 (11.2)         | 40 (13.9)         | 11.9              | 11.1              | 11.6              | 14.4              |  |
| Overall fatigue in past month (vs. none)        |                   |                   |                   |                   |                   |                   |                   |                   |  |
| Baseline                                        | 391 (27.5)        | 143 (24.4)        | 143 (26.0)        | 105 (37.2)        | 28.3              | 26.1              | 26.1              | 37.4              |  |
| Missing                                         | 10                | 2                 | 3                 | 5                 |                   |                   |                   |                   |  |
| Ever during study period                        | 686 (48.1)        | 276 (46.9)        | 238 (43.0)        | 172 (60.6)        | 47.9              | 46.8              | 43.2              | 60.1              |  |
| Missing                                         | 4                 | 0                 | 1                 | 3                 |                   |                   |                   |                   |  |
| Restless sleep in past week (vs. none)          |                   |                   |                   |                   |                   |                   |                   |                   |  |
| Baseline                                        | 322 (22.7)        | 108 (18.4)        | 140 (25.4)        | 74 (26.2)         | 21.8              | 17.0              | 24.8              | 25.8              |  |
| Missing                                         | 10                | 2                 | 3                 | 5                 |                   |                   |                   |                   |  |
| Ever during study period                        | 758 (53.2)        | 330 (56.0)        | 277 (50.1)        | 151 (53.2)        | 53.0              | 57.2              | 49.0              | 52.4              |  |
| Missing                                         | 4                 | 0                 | 1                 | 3                 |                   |                   |                   |                   |  |
| High depressive symptoms (vs. low) <sup>g</sup> |                   |                   |                   |                   |                   |                   |                   |                   |  |
| Baseline                                        | 337 (23.7)        | 114 (19.4)        | 140 (25.4)        | 83 (29.4)         | 23.8              | 20.1              | 25.1              | 29.2              |  |
| Missing                                         | 10                | 2                 | 3                 | 5                 |                   |                   |                   |                   |  |
| Ever during study period                        | 790 (55.4)        | 334 (56.7)        | 289 (52.3)        | 167 (58.8)        | 56.4              | 59.7              | 52.2              | 58.0              |  |
| Missing                                         | 4                 | 0                 | 1                 | 3                 |                   |                   |                   |                   |  |
| Diabetes diagnosis (vs. none)                   |                   |                   |                   |                   |                   |                   |                   |                   |  |
| Baseline                                        | 442 (30.9)        | 163 (27.7)        | 144 (26.0)        | 135 (47.0)        | 31.8              | 29.4              | 26.3              | 48.5              |  |
| Ever during study period                        | 650 (45.5)        | 282 (47.9)        | 210 (37.9)        | 158 (55.1)        | 46.5              | 49.3              | 38.7              | 56.8              |  |
| US acculturation <sup>h</sup>                   |                   |                   |                   |                   |                   |                   |                   |                   |  |
| High total (vs. low)                            | 523 (36.6)        | 254 (43.1)        | 169 (30.5)        | 100 (34.8)        | 37.0              | 43.6              | 30.6              | 36.1              |  |
| High language (vs. low)                         | 692 (48.4)        | 319 (54.2)        | 233 (42.1)        | 140 (48.8)        | 47.9              | 52.9              | 42.1              | 49.7              |  |
| High identity (vs. low)                         | 247 (17.3)        | 126 (21.4)        | 72 (13.0)         | 49 (17.1)         | 17.2              | 21.6              | 12.8              | 17.1              |  |
| Cognitive outcomes                              |                   |                   |                   |                   |                   |                   |                   |                   |  |
| 3MSE (raw score)                                | 89.0 (82.0, 94.0) | 91.0 (85.0, 95.0) | 89.0 (82.0, 94.0) | 86.0 (80.0, 93.0) | 89.0 (81.0, 94.0) | 89.0 (82.0, 95.0) | 89.0 (81.0, 93.0) | 86.0 (80.0, 93.0) |  |
| Incident dementia diagnosis (vs. none)          | 146 (10.2)        | 62 (10.5)         | 26 (4.7)          | 58 (20.2)         | 10.6              | 12.8              | 4.5               | 18.5              |  |

Abbreviations: CIND, cognitive impairment, no dementia; US, United States; 3MSE, Modified Mini-Mental State Examination.

<sup>a</sup>Characteristics collected at baseline unless otherwise stated.

<sup>b</sup>Non-US birth country: Mexico, 88.8%; other, 11.2.

<sup>c</sup>Migration age restricted to  $n = 721$  non-US born participants.

<sup>d</sup>Education: high,  $\geq 12$  years/high school/GED; low,  $< 12$  years/high school/GED.

<sup>e</sup>Includes participants categorized as unemployed or housewives.

<sup>f</sup>Beer, wine, or liquor.

<sup>g</sup>20-item Center for the Epidemiological Studies of Depression Scale score  $\geq 16$  = high.

<sup>h</sup>Acculturation Rating Scale for Mexican Americans-II (ARSMA-II).

**Web Table 2.** Unweighted Changes in Cognitive Assessment Scores by Total US Acculturation, Overall and by Educational Level<sup>a</sup>: Sacramento Area Latino Study on Aging, Sacramento, California, 1998–2008

|                             | <i>β (Standard Error) of Log-Transformed 3MSE Errors</i> |                      |                      |                      |
|-----------------------------|----------------------------------------------------------|----------------------|----------------------|----------------------|
|                             | High Total US Acculturation (vs. Low)                    |                      |                      |                      |
|                             | Crude                                                    | Model 1 <sup>b</sup> | Model 2 <sup>c</sup> | Model 3 <sup>d</sup> |
|                             | Overall ( <i>n</i> = 1,430)                              |                      |                      |                      |
| High US acculturation       | -0.60 (0.04)*                                            | -0.58 (0.04)*        | -0.32 (0.04)*        | -0.20 (0.05)*        |
| Age                         | 0.03 (0.00)*                                             | 0.10 (0.00)*         | 0.10 (0.00)*         | 0.10 (0.00)*         |
| High US acculturation × age | 0.00 (0.00)                                              | 0.00 (0.00)          | -0.00 (0.00)         | 0.00 (0.00)          |
|                             | Low education ( <i>n</i> = 969) <sup>a</sup>             |                      |                      |                      |
| High US acculturation       | -0.40 (0.05)*                                            | -0.40 (0.05)*        |                      | -0.20 (0.06)*        |
| Age                         | 0.03 (0.00)*                                             | 0.09 (0.01)*         |                      | 0.09 (0.01)*         |
| High US acculturation × age | -0.00 (0.01)                                             | -0.00 (0.01)         |                      | -0.01 (0.01)         |
|                             | High education ( <i>n</i> = 461) <sup>a</sup>            |                      |                      |                      |
| High US acculturation       | -0.19 (0.06)*                                            | -0.17 (0.06)*        |                      | -0.19 (0.07)*        |
| Age                         | 0.03 (0.01)*                                             | 0.12 (0.01)*         |                      | 0.12 (0.01)*         |
| High US acculturation × age | 0.00 (0.01)                                              | 0.00 (0.01)          |                      | 0.00 (0.01)          |

Abbreviations: US, United States; 3MSE, Modified Mini-Mental State Examination.

\**P* ≤ 0.05, 2-sided.

<sup>a</sup>Education: high, ≥12 years/high school/GED; low, <12 years/high school/GED.

<sup>b</sup>Adjusted for baseline age, practice effects, sex, marital status.

<sup>c</sup>Adjusted for baseline age, practice effects, sex, marital status, and education.

<sup>d</sup>Adjusted for baseline age, practice effects, sex, marital status, survey language, and in overall models, education.

**Web Table 3.** Unweighted Risk of Incident Dementia/CIND by Total US Acculturation, Overall and by Educational Level<sup>a</sup>: Sacramento Area Latino Study on Aging, Sacramento, California, 1998–2008

|                      | <i>Hazard Ratio (95% Confidence Interval)</i> |               |  |                        |                |  |
|----------------------|-----------------------------------------------|---------------|--|------------------------|----------------|--|
|                      | High Total US Acculturation (vs. Low)         |               |  | Education <sup>a</sup> |                |  |
|                      | Overall                                       |               |  | Low                    | High           |  |
|                      | <i>n</i> = 1,430                              |               |  | <i>n</i> = 969         | <i>n</i> = 461 |  |
| Crude                | 0.65                                          | (0.46, 0.94)* |  | 0.77                   | (0.49, 1.20)   |  |
| Model 1 <sup>b</sup> | 0.64                                          | (0.44, 0.91)* |  | 0.76                   | (0.48, 1.19)   |  |
| Model 2 <sup>c</sup> | 0.74                                          | (0.50, 1.10)  |  |                        |                |  |
| Model 3 <sup>d</sup> | 0.73                                          | (0.44, 1.26)  |  | 0.82                   | (0.45, 1.50)   |  |
|                      |                                               |               |  | 0.50                   | (0.20, 1.21)   |  |

Abbreviations: CIND, cognitive impairment, no dementia; US, United States.

\* $P \leq 0.05$ , 2-sided.

<sup>a</sup>Education: high,  $\geq 12$  years/high school/GED; low,  $< 12$  years/high school/GED.

<sup>b</sup>Adjusted for baseline age, sex, marital status.

<sup>c</sup>Adjusted for baseline age, sex, marital status, and education.

<sup>d</sup>Adjusted for baseline age, sex, marital status, survey language, and in overall models, education.

**Web Table 4.** Unweighted Changes in Cognitive Assessment Scores by Language and Identity US Acculturation, Overall and by Educational Level<sup>a</sup>: Sacramento Area Latino Study on Aging, Sacramento, California, 1998–2008

|                                               | <i>β (Standard Error) of Log-Transformed 3MSE Errors</i> |                      |                      |               |                      |                      |                      |               |
|-----------------------------------------------|----------------------------------------------------------|----------------------|----------------------|---------------|----------------------|----------------------|----------------------|---------------|
|                                               | High US Acculturation (vs. Low)                          |                      |                      |               |                      |                      |                      |               |
|                                               | Crude                                                    | Language             |                      |               | Identity             |                      |                      |               |
|                                               | Model 1 <sup>b</sup>                                     | Model 2 <sup>c</sup> | Model 3 <sup>d</sup> | Crude         | Model 1 <sup>b</sup> | Model 2 <sup>c</sup> | Model 3 <sup>d</sup> |               |
| Overall ( <i>n</i> = 1,430)                   |                                                          |                      |                      |               |                      |                      |                      |               |
| High US acculturation                         | -0.62 (0.03)*                                            | -0.60 (0.03)*        | -0.33 (0.04)*        | -0.23 (0.05)* | -0.50 (0.05)*        | -0.48 (0.05)*        | -0.21 (0.05)*        | -0.10 (0.05)* |
| Age                                           | 0.03 (0.00)*                                             | 0.09 (0.01)*         | 0.09 (0.01)*         | 0.10 (0.01)*  | 0.04 (0.00)*         | 0.10 (0.00)*         | 0.10 (0.00)*         | 0.10 (0.00)*  |
| High US acculturation × age                   | 0.01 (0.00)                                              | 0.01 (0.00)          | 0.00 (0.00)          | 0.00 (0.00)   | 0.00 (0.01)          | 0.00 (0.01)          | 0.00 (0.01)          | 0.00 (0.01)   |
| Low education ( <i>n</i> = 969) <sup>a</sup>  |                                                          |                      |                      |               |                      |                      |                      |               |
| High US acculturation                         | -0.40 (0.04)*                                            | -0.39 (0.04)*        |                      | -0.24 (0.07)* | -0.29 (0.07)*        | -0.27 (0.07)*        |                      | -0.03 (0.08)  |
| Age                                           | 0.03 (0.00)*                                             | 0.08 (0.01)*         |                      | 0.08 (0.01)*  | 0.03 (0.00)*         | 0.08 (0.01)*         |                      | 0.08 (0.01)*  |
| High US acculturation × age                   | 0.00 (0.00)                                              | 0.00 (0.01)          |                      | -0.00 (0.01)  | 0.00 (0.01)          | 0.00 (0.01)          |                      | 0.00 (0.01)   |
| High education ( <i>n</i> = 461) <sup>a</sup> |                                                          |                      |                      |               |                      |                      |                      |               |
| High US acculturation                         | -0.13 (0.07)                                             | -0.13 (0.07)         |                      | -0.12 (0.10)  | -0.17 (0.06)*        | -0.16 (0.06)*        |                      | -0.15 (0.06)* |
| Age                                           | 0.03 (0.01)*                                             | 0.11 (0.01)*         |                      | 0.11 (0.01)*  | 0.03 (0.00)*         | 0.12 (0.01)*         |                      | 0.12 (0.01)*  |
| High US acculturation × age                   | 0.01 (0.01)                                              | 0.01 (0.01)          |                      | 0.01 (0.01)   | 0.00 (0.01)          | 0.00 (0.01)          |                      | -0.00 (0.01)  |

Abbreviations: US, United States; 3MSE, Modified Mini-Mental State Examination.

\**P* ≤ 0.05, 2-sided.

<sup>a</sup>Education: high, ≥12 years/high school/GED; low, <12 years/high school/GED.

<sup>b</sup>Adjusted for baseline age, practice effects, sex, marital status.

<sup>c</sup>Adjusted for baseline age, practice effects, sex, marital status, and education.

<sup>d</sup>Adjusted for baseline age, practice effects, sex, marital status, survey language, and in overall models, education.

**Web Table 5.** Unweighted Risk of Incident Dementia/CIND by Language and Identity US Acculturation, Overall and by Educational Level<sup>a</sup>: Sacramento Area Latino Study on Aging, 1998–2008

|                      | <i>Hazard Ratio (95% Confidence Interval)</i> |               |                        |              |                        |              |
|----------------------|-----------------------------------------------|---------------|------------------------|--------------|------------------------|--------------|
|                      | Overall<br><i>n</i> = 1,430                   |               | Education <sup>a</sup> |              |                        |              |
|                      |                                               |               | Low<br><i>n</i> = 969  |              | High<br><i>n</i> = 461 |              |
|                      | High language US acculturation (vs. low)      |               |                        |              |                        |              |
| Crude                | 0.75                                          | (0.54, 1.04)  | 0.89                   | (0.61, 1.29) | 0.78                   | (0.29, 2.07) |
| Model 1 <sup>b</sup> | 0.70                                          | (0.50, 0.97)* | 0.83                   | (0.56, 1.22) | 0.75                   | (0.28, 2.01) |
| Model 2 <sup>c</sup> | 0.82                                          | (0.57, 1.18)  |                        |              |                        |              |
| Model 3 <sup>d</sup> | 0.86                                          | (0.54, 1.37)  | 0.93                   | (0.57, 1.51) | 0.48                   | (0.11, 2.03) |
|                      | High identity US acculturation (vs. low)      |               |                        |              |                        |              |
| Crude                | 0.51                                          | (0.30, 0.86)* | 0.70                   | (0.37, 1.33) | 0.40                   | (0.16, 1.03) |
| Model 1 <sup>b</sup> | 0.53                                          | (0.31, 0.89)* | 0.71                   | (0.37, 1.37) | 0.43                   | (0.17, 1.12) |
| Model 2 <sup>c</sup> | 0.61                                          | (0.35, 1.05)  |                        |              |                        |              |
| Model 3 <sup>d</sup> | 0.62                                          | (0.35, 1.11)  | 0.78                   | (0.39, 1.56) | 0.39                   | (0.15, 1.04) |

Abbreviations: CIND, cognitive impairment, no dementia; US, United States.

\**P* ≤ 0.05, 2-sided.

<sup>a</sup>Education: high, ≥12 years/high school/GED; low, <12 years/high school/GED.

<sup>b</sup>Adjusted for baseline age, sex, marital status.

<sup>c</sup>Adjusted for baseline age, sex, marital status, and education.

<sup>d</sup>Adjusted for baseline age, sex, marital status, survey language, and in overall models, education.

**Web Table 6.** Unweighted Changes in Changes in Cognitive Assessment Scores by 3-level Language US Acculturation, Overall ( $n = 1,430$ ), Sacramento Area Latino Study on Aging, 1998–2008

|                                |            | $\beta$ (Standard Error) of Log-Transformed 3MSE Errors<br>Language US Acculturation (vs. Low) |                      |                      |                      |
|--------------------------------|------------|------------------------------------------------------------------------------------------------|----------------------|----------------------|----------------------|
|                                |            | Crude                                                                                          | Model 1 <sup>a</sup> | Model 2 <sup>b</sup> | Model 3 <sup>c</sup> |
| High US acculturation          |            |                                                                                                |                      |                      |                      |
|                                | Bicultural | 0.25 (0.08)*                                                                                   | 0.24 (0.08)*         | 0.18 (0.07)*         | 0.15 (0.08)*         |
|                                | High       | 0.65 (0.04)*                                                                                   | 0.63 (0.04)*         | 0.37 (0.04)*         | 0.29 (0.06)*         |
| Age                            |            | 0.04 (0.00)*                                                                                   | 0.09 (0.01)*         | 0.09 (0.01)*         | 0.09 (0.01)*         |
| High US acculturation ×<br>age |            |                                                                                                |                      |                      |                      |
|                                | Bicultural | 0.01 (0.01)                                                                                    | 0.01 (0.01)          | 0.02 (0.01)          | 0.01 (0.01)          |
|                                | High       | -0.01 (0.00)                                                                                   | -0.01 (0.00)         | -0.00 (0.00)         | -0.00 (0.00)         |

Abbreviations: IPCW, inverse probability censoring weights; US, United States; 3MSE, Modified Mini Mental State Examination.

\* $P \leq 0.05$ , 2-sided.

<sup>a</sup>Adjusted for baseline age, practice effects, sex, marital status.

<sup>b</sup>Adjusted for baseline age, practice effects, sex, marital status, and education.

<sup>c</sup>Adjusted for baseline age, practice effects, sex, marital status, education, and survey language.



**Web Table 7.** IPCW-weighted Changes in Cognitive Assessment Scores by Total US Acculturation, Overall and by Educational Level<sup>a</sup>: Sacramento Area Latino Study on Aging, Sacramento, California, 1998–2008

|                                               | $\beta$ (Standard Error) of Log-Transformed 3MSE Errors |                      |                      |                      |                      |                      |
|-----------------------------------------------|---------------------------------------------------------|----------------------|----------------------|----------------------|----------------------|----------------------|
|                                               | High Total US Acculturation (vs. Low)                   |                      |                      |                      |                      |                      |
|                                               | Crude                                                   | Model 1 <sup>b</sup> | Model 2 <sup>c</sup> | Model 3 <sup>d</sup> | Model 4 <sup>e</sup> | Model 5 <sup>f</sup> |
| Overall ( <i>n</i> = 1,418)                   |                                                         |                      |                      |                      |                      |                      |
| High US acculturation                         | -0.61 (0.04)*                                           | -0.59 (0.04)*        | -0.33 (0.04)*        | -0.21 (0.05)*        | -0.21 (0.05)*        | -0.20 (0.05)*        |
| Age                                           | 0.03 (0.00)*                                            | 0.09 (0.00)*         | 0.09 (0.00)*         | 0.09 (0.00)*         | 0.09 (0.00)*         | 0.09 (0.00)*         |
| High US acculturation × age                   | 0.00 (0.00)                                             | 0.00 (0.00)          | 0.00 (0.00)          | 0.00 (0.00)          | 0.00 (0.00)          | 0.00 (0.00)          |
| Low education ( <i>n</i> = 959) <sup>a</sup>  |                                                         |                      |                      |                      |                      |                      |
| High US acculturation                         | -0.41 (0.05)*                                           | -0.41 (0.05)*        |                      | -0.21 (0.06)*        | -0.22 (0.06)*        | -0.21 (0.06)*        |
| Age                                           | 0.03 (0.00)*                                            | 0.08 (0.01)*         |                      | 0.08 (0.01)*         | 0.08 (0.01)*         | 0.08 (0.01)*         |
| High US acculturation × age                   | -0.00 (0.01)                                            | -0.00 (0.01)         |                      | -0.00 (0.01)         | -0.00 (0.01)         | -0.00 (0.01)         |
| High education ( <i>n</i> = 459) <sup>a</sup> |                                                         |                      |                      |                      |                      |                      |
| High US acculturation                         | -0.19 (0.06)*                                           | -0.16 (0.06)*        |                      | -0.20 (0.07)*        | -0.20 (0.08)*        | -0.18 (0.08)*        |
| Age                                           | 0.04 (0.01)*                                            | 0.12 (0.01)*         |                      | 0.12 (0.01)*         | 0.12 (0.01)*         | 0.12 (0.01)*         |
| High US acculturation × age                   | -0.00 (0.01)                                            | 0.00 (0.01)          |                      | -0.00 (0.01)         | -0.00 (0.01)         | -0.00 (0.01)         |

Abbreviations: IPCW, inverse probability censoring weights; US, United States; 3MSE, Modified Mini-Mental State Examination.

\* $P \leq 0.05$ , 2-sided.

<sup>a</sup>Education: high,  $\geq 12$  years/high school/GED; low,  $< 12$  years/high school/GED.

<sup>b</sup>Adjusted for baseline age, practice effects, sex, marital status.

<sup>c</sup>Adjusted for baseline age, practice effects, sex, marital status, and education.

<sup>d</sup>Adjusted for baseline age, practice effects, sex, marital status, survey language, and in overall models, education.

<sup>e</sup>Adjusted for baseline age, practice effects, sex, marital status, survey language, nativity, migration age to the US, and in overall models, education.

<sup>f</sup>Adjusted for baseline age, practice effects, sex, marital status, survey language, nativity, migration age to the US, insurance status, and in overall models, education.

**Web Table 8.** IPCW-weighted Risk of Incident Dementia/CIND by Total US Acculturation Status, Overall and by Educational Level<sup>a</sup>: Sacramento Area Latino Study on Aging, Sacramento, California, 1998–2008

|                      | <i>Hazard Ratio (95% Confidence Interval)</i> |               |                |                        |                |              |
|----------------------|-----------------------------------------------|---------------|----------------|------------------------|----------------|--------------|
|                      | High Total US Acculturation (vs. Low)         |               |                | Education <sup>a</sup> |                |              |
|                      | Overall                                       |               | Low            |                        | High           |              |
|                      | <i>n</i> = 1,418                              |               | <i>n</i> = 959 |                        | <i>n</i> = 459 |              |
| Crude                | 0.64                                          | (0.45, 0.91)* | 0.75           | (0.49, 1.15)           | 0.73           | (0.30, 1.79) |
| Model 1 <sup>b</sup> | 0.62                                          | (0.44, 0.89)* | 0.74           | (0.49, 1.14)           | 0.73           | (0.30, 1.80) |
| Model 2 <sup>c</sup> | 0.75                                          | (0.51, 1.10)  |                |                        |                |              |
| Model 3 <sup>d</sup> | 0.81                                          | (0.49, 1.35)  | 0.91           | (0.51, 1.63)           | 0.48           | (0.18, 1.30) |
| Model 4 <sup>e</sup> | 0.82                                          | (0.48, 1.39)  | 0.95           | (0.52, 1.73)           | 0.43           | (0.14, 1.31) |
| Model 5 <sup>f</sup> | 0.82                                          | (0.48, 1.40)  | 0.95           | (0.52, 1.74)           | 0.47           | (0.14, 1.57) |

Abbreviations: CIND, cognitive impairment, no dementia; IPCW, inverse probability censoring weights; US, United States.

\* $P \leq 0.05$ , 2-sided.

<sup>a</sup>Education: high,  $\geq 12$  years/high school/GED; low,  $< 12$  years/high school/GED.

<sup>b</sup>Adjusted for baseline age, sex, marital status.

<sup>c</sup>Adjusted for baseline age, sex, marital status, and education.

<sup>d</sup>Adjusted for baseline age, sex, marital status, survey language, and in overall models, education.

<sup>e</sup>Adjusted for baseline age, sex, marital status, survey language, nativity, migration age to the US, and in overall models, education.

<sup>f</sup>Adjusted for baseline age, sex, marital status, survey language, nativity, migration age to the US, insurance status, and in overall models, education.

**Web Table 9.** IPCW-weighted Changes in Cognitive Assessment Scores by Total US Acculturation without Bicultural Participants, Overall and by Educational Level<sup>a</sup>: Sacramento Area Latino Study on Aging, Sacramento, California, 1998–2008

|                                           | $\beta$ (Standard Error) of Log-Transformed 3MSE Errors |                      |                      |                      |                      |                      |
|-------------------------------------------|---------------------------------------------------------|----------------------|----------------------|----------------------|----------------------|----------------------|
|                                           | Crude                                                   | Model 1 <sup>b</sup> | Model 2 <sup>c</sup> | Model 3 <sup>d</sup> | Model 4 <sup>e</sup> | Model 5 <sup>f</sup> |
| High Total US Acculturation (vs. Low)     |                                                         |                      |                      |                      |                      |                      |
| Overall ( $n = 1,409$ )                   |                                                         |                      |                      |                      |                      |                      |
| High US acculturation                     | -0.60 (0.04)*                                           | -0.58 (0.04)*        | -0.32 (0.04)*        | -0.20 (0.05)*        | -0.19 (0.05)*        | -0.19 (0.05)*        |
| Age                                       | 0.03 (0.00)*                                            | 0.09 (0.00)*         | 0.09 (0.00)*         | 0.09 (0.00)*         | 0.09 (0.00)*         | 0.09 (0.00)*         |
| High US acculturation $\times$ age        | 0.00 (0.00)                                             | 0.00 (0.00)          | 0.00 (0.00)          | 0.00 (0.00)          | 0.00 (0.00)          | 0.00 (0.00)          |
| Low education ( $n = 955$ ) <sup>a</sup>  |                                                         |                      |                      |                      |                      |                      |
| High US acculturation                     | -0.40 (0.05)*                                           | -0.40 (0.05)*        |                      | -0.19 (0.07)*        | -0.20 (0.07)*        | -0.20 (0.07)*        |
| Age                                       | 0.03 (0.00)*                                            | 0.08 (0.01)*         |                      | 0.08 (0.01)*         | 0.08 (0.01)*         | 0.08 (0.01)*         |
| High US acculturation $\times$ age        | -0.00 (0.01)                                            | -0.00 (0.01)         |                      | -0.00 (0.01)         | -0.00 (0.01)         | -0.00 (0.01)         |
| High education ( $n = 454$ ) <sup>a</sup> |                                                         |                      |                      |                      |                      |                      |
| High US acculturation                     | -0.18 (0.06)*                                           | -0.16 (0.06)*        |                      | -0.19 (0.07)*        | -0.19 (0.08)*        | -0.17 (0.08)*        |
| Age                                       | 0.04 (0.01)*                                            | 0.12 (0.01)*         |                      | 0.12 (0.01)*         | 0.12 (0.01)*         | 0.12 (0.01)*         |
| High US acculturation $\times$ age        | 0.00 (0.01)                                             | 0.00 (0.01)          |                      | -0.00 (0.01)         | -0.00 (0.01)         | -0.00 (0.01)         |

Abbreviations: IPCW, inverse probability censoring weights; US, United States; 3MSE, Modified Mini-Mental State Examination.

\* $P \leq 0.05$ , 2-sided.

<sup>a</sup>Education: high,  $\geq 12$  years/high school/GED; low,  $< 12$  years/high school/GED.

<sup>b</sup>Adjusted for baseline age, practice effects, sex, marital status.

<sup>c</sup>Adjusted for baseline age, practice effects, sex, marital status, and education.

<sup>d</sup>Adjusted for baseline age, practice effects, sex, marital status, survey language, and in overall models, education.

<sup>e</sup>Adjusted for baseline age, practice effects, sex, marital status, survey language, nativity, migration age to the US, and in overall models, education.

<sup>f</sup>Adjusted for baseline age, practice effects, sex, marital status, survey language, nativity, migration age to the US, insurance status, and in overall models, education.

**Web Table 10.** IPCW-weighted Risk of Incident Dementia/CIND by Total US Acculturation Status without Bicultural Participants, Overall and by Educational Level<sup>a</sup>: Sacramento Area Latino Study on Aging, Sacramento, California, 1998–2008

|                      | <i>Hazard Ratio (95% Confidence Interval)</i> |                |      |                        |      |              |
|----------------------|-----------------------------------------------|----------------|------|------------------------|------|--------------|
|                      | High Total US Acculturation (vs. Low)         |                |      | Education <sup>a</sup> |      |              |
|                      | Overall                                       | Low            |      | High                   |      |              |
|                      | <i>n</i> = 1,409                              | <i>n</i> = 955 |      | <i>n</i> = 454         |      |              |
| Crude                | 0.65                                          | (0.45, 0.92)*  | 0.76 | (0.50, 1.16)           | 0.74 | (0.30, 1.82) |
| Model 1 <sup>b</sup> | 0.63                                          | (0.44, 0.91)*  | 0.76 | (0.49, 1.16)           | 0.74 | (0.30, 1.83) |
| Model 2 <sup>c</sup> | 0.76                                          | (0.52, 1.12)   |      |                        |      |              |
| Model 3 <sup>d</sup> | 0.83                                          | (0.50, 1.38)   | 0.92 | (0.52, 1.65)           | 0.49 | (0.18, 1.35) |
| Model 4 <sup>e</sup> | 0.84                                          | (0.49, 1.43)   | 0.96 | (0.53, 1.76)           | 0.44 | (0.14, 1.35) |
| Model 5 <sup>f</sup> | 0.84                                          | (0.49, 1.43)   | 0.96 | (0.53, 1.77)           | 0.48 | (0.14, 1.62) |

Abbreviations: CIND, cognitive impairment, no dementia; IPCW, inverse probability censoring weights; US, United States.

\* $P \leq 0.05$ , 2-sided.

<sup>a</sup>Education: high,  $\geq 12$  years/high school/GED; low,  $< 12$  years/high school/GED.

<sup>b</sup>Adjusted for baseline age, sex, marital status.

<sup>c</sup>Adjusted for baseline age, sex, marital status, and education.

<sup>d</sup>Adjusted for baseline age, sex, marital status, survey language, and in overall models, education.

<sup>e</sup>Adjusted for baseline age, sex, marital status, survey language, nativity, migration age to the US, and in overall models, education.

<sup>f</sup>Adjusted for baseline age, sex, marital status, survey language, nativity, migration age to the US, insurance status, and in overall models, education.
